**Table 3 Calculated contact stress**

|                      | Mean Hertz stress (N/m <sup>2</sup> ) × 10 <sup>-9</sup> |            |                 |
|----------------------|----------------------------------------------------------|------------|-----------------|
|                      | Ball-inner                                               | Ball-outer | Ball-ball (max) |
| Mineral oil          | 1.002                                                    | 0.832      | > 1.323         |
| Traction fluid       | 1.002                                                    | 0.832      | 1.125           |
| <i>n</i> -hexadecane | 1.002                                                    | 0.832      | 1.125           |

### Summary

Substantial load carrying capacity has been demonstrated for the ball-ball contacts in a small high-speed ball bearing. Lubricants of widely varying structure and type showed differing ball-race coupling and scuff resistance, but in every case sufficient capacity existed for full complement operation. It is suggested that this mode is thus an attractive and viable solution to the retainer instability problem.

### References

- 1 Kingsbury, E. P., "Torque Variations in Instrument Ball Bearings," *ASLE Trans.*, Vol. 8, 1965.
- 2 Kingsbury, E., "Large Bearing Operation Without Retainer," *Lub. Eng.*, Vol. 35, 1979.
- 3 Harris, T., *Rolling Bearing Analysis*, Wiley, 1966.
- 4 Hamrock, B. J., "Elastohydrodynamic Lubrication of Point Contacts," NASA TMX-73454, 1976.
- 5 Kingsbury, E. P., "Lubricant Breakdown in Instrument Ball Bearings," *ASME JOURNAL OF LUBRICATION TECHNOLOGY*, Vol. 100, 1978.
- 6 Kingsbury, E. P., "Basic Speed Ratio of an Angular Contact Ball Bearing," *ASME JOURNAL OF LUBRICATION TECHNOLOGY*, Vol. 102, 1980.
- 7 Kingsbury, E. P., "Slip Measurement in an Angular Contact Ball Bearing," ASME Paper 81-Lub-33.
- 8 Kingsbury, E., "Ball Motion Perturbation in an Angular Contact Ball Bearing," ASLE Paper 81-AM-IE-1.
- 9 Horsch, J. D., "Correlation of Gyro Spin Axis Ball Bearing Performance with the Dynamic Lubricating Film," *ASLE Trans.*, Vol. 6, 1963.
- 10 Chiu, Y. P., "An Analysis and Prediction of Lubricant Film Starvation in Rolling Contact Systems," *ASLE Trans.*, Vol. 17, 1974.
- 11 Coy, J., and Zaretsky, E., "Some Limitations in Applying Classical Film Thickness Formulae to a High Speed Bearing," *ASME JOURNAL OF LUBRICATION TECHNOLOGY*, Vol. 103, 1981.
- 12 Kingsbury, E., "Discussion on Reference [11]," *ibid.*
- 13 Kingsbury, E. P., "Lubricant Breakdown Acceleration in Instrument Ball Bearings," presented at the Fifth Inertial Guidance Community Contamination Control Seminar, Hughes Aircraft Co., El Segundo, Calif. 1979.
- 14 Kingsbury, E., "Dynamic and Coupling Influences on Basic Speed Ratio of an Angular Contact Ball Bearing," *Wear*, Vol. 63, 1980.

15 Cameron, A., "Hydrodynamic Lubrication of Rotating Disks in Pure Sliding," *Journal of Institute of Petroleum*, Vol. 37, 1951.

16 Salbu, E. O. J., "Compressible Squeeze Films and Squeeze Bearings," *ASME Journal of Basic Engineering*, 1964.

## DISCUSSION

### R. Hemskerk<sup>1</sup>

Dr. Kingsbury mentioned that he did not get scuffing failures for the tests with mineral oil lubrication. However, tracks were formed on the balls. We have observed the same phenomenon in a retainerless bearing, but by means of etching we observed that the track formation on the balls was due to rehardening of the ball surface, indicating that very high "flash" temperatures had taken place, although no scuffing failure. I suggest that Dr. Kingsbury etches his balls also in order to check whether high surface temperatures had occurred in his experiments with mineral oil.

### Author's Closure

A further discussion of ball tracks will be found in the reference.<sup>2</sup> In both that paper and the present paper the tracks are attributed to organic deposits derived from the lubricant. The reason is that the tracks can be removed without trace (if they have not grown too dense) with concentrated H<sub>2</sub>SO<sub>4</sub>. This is not exactly etching within Mr. Hemskerk's meaning, but does indicate something of the nature of the present tracks. It would be unwise for me to speculate on Mr. Hemskerk's tracks without more detailed information on his work, unpublished so far as I know.

In any case, the main point of the present paper is that plenty of load carrying capacity exists between the balls in a retainerless bearing, and that retainer instability is an unnecessary burden for the bearing engineer.

<sup>1</sup>SKF Engineering and Research Centre, Nieuwegein, Netherlands.

<sup>2</sup>Kingsbury, E., "Ball Contact Locus in an Angular Contact Bearing," Submitted to ASME.
